# Supplementary material for: Ag8Cl2[Se2P(OEt)2]6: A rare example containing a combination of discrete clusters and chainsElectronic supplementary information (ESI) available: analytical data for compounds 1 and 2. See http://www.rsc.org/suppdata/cc/b3/b300887h/
Source: Royal Society of Chemistry journal article supplement (doi:10.1039/b300887h), 2003-03-18
Supplement: b300887h.doc [file b300887h.doc]

# Supplementary data

**1a**: Anal. Calcd for C24H60BrAg8F6O12P7Se12．C6H14: C, 12.65; H, 2.62. Found: C, 12.67; H, 2.15; FAB MS, m/z 2617.3 (M+calcd, 2616.9); 1H NMR (CDCl3)  1.39 [t; 36H, OCH2C*H*3, 3*J*HH = 7 Hz ], 4.17 [m, 24H, OC*H*2CH3]; 31P {1H} NMR (CDCl3)  81.5 [s, 6P, *P*(OEt)2, *J*PSe = 664 Hz], -143.0 (septet, PF6-, *J*PF = 712); **1b**: Anal. Calcd for C24H60ClAg8F6O12P7Se12: C, 10.61; H, 2.23. Found: C, 11.13; H, 2.26; FAB MS, m/z 2573.2 (M+calcd, 2572.5); 1H NMR (CDCl3)  1.39 [t; 36H, OCH2C*H*3, 3*J*HH = 7 Hz ], 4.17 [m, 24H, OC*H*2CH3]; 31P {1H} NMR (CDCl3)  82.3 [s, 6P, *P*(OEt)2, *J*PSe = 661 Hz], -143.0 (septet, PF6-, *J*PF = 712); **2a**: Anal. Calcd for C24H60Br2Ag8O12P6Se12: C, 10.69; H, 2.24. Found: C, 11.26; H, 2.15; FAB MS, m/z 2617.3 (M+calcd, 2616.9); 1H NMR (CDCl3)  1.39 [t; 36H, OCH2C*H*3, 3*J*HH = 7 Hz ], 4.17 [m, 24H, OC*H*2CH3]; 31P {1H} NMR (CDCl3)  81.5 [s, 6P, *P*(OEt)2, *J*PSe = 664 Hz], **2b**: Anal. Calcd for C24H60Cl2Ag8O12P6Se12: C, 11.05; H, 2.32. Found: C, 11.23; H, 2.34; FAB MS, m/z 2573.2 (M+calcd, 2572.5); 1H NMR (CDCl3)  1.39 [t; 36H, OCH2C*H*3, 3*J*HH = 7 Hz ], 4.17 [m, 24H, OC*H*2CH3]; 31P {1H} NMR (CDCl3)  82.3 [s, 6P, *P*(OEt)2, *J*PSe = 661 Hz].
